# Supplementary material for: Efficient photocatalytic hydrogen production over eosin Y-sensitized MoS2
Source: Royal Society of Chemistry journal article supplement (doi:10.1039/c6ra14710k), 2016-01-01
Supplement: c6ra14710k1.pdf [file c6ra14710k1.pdf]

## Supporting Information

### Efficient photocatalytic hydrogen production over Eosin Y-sensitized MoS<sub>2</sub>

Mingcai Yin\*, Chaojun Wu, Fangfang Jia, Lijiao Wang, Pengfei Zheng and Yaoting Fan

College of Chemistry and Molecular Engineering, Zhengzhou University, No.100 of Science Road,,

Zhengzhou, 450001, P. R. China

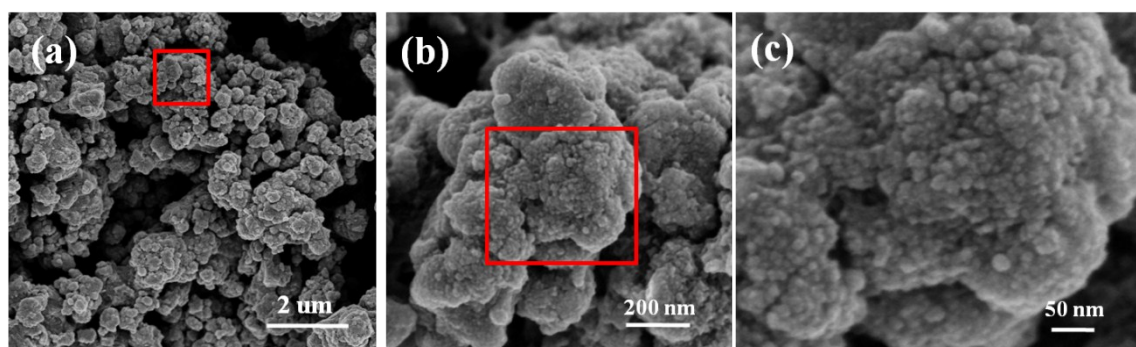

Fig. S1. SEM images of MoS<sub>2</sub> sample recovered after four runs of H<sub>2</sub>-evolving reaction.

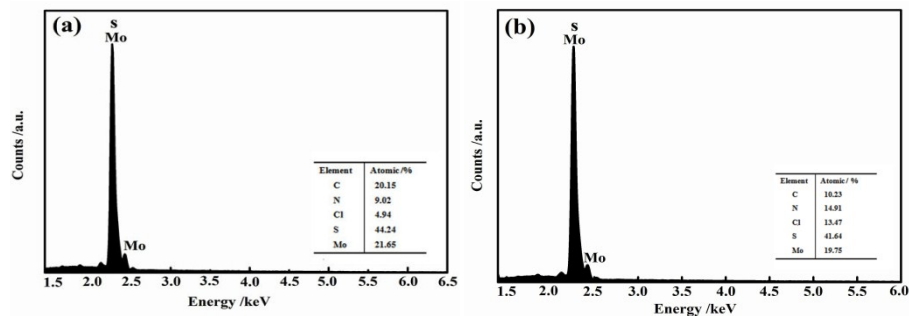

Fig. S2. EDS analyses of the MoS<sub>2</sub> samples (a) as-prepared and (b) recovered after four runs of H<sub>2</sub>-evolving reaction.

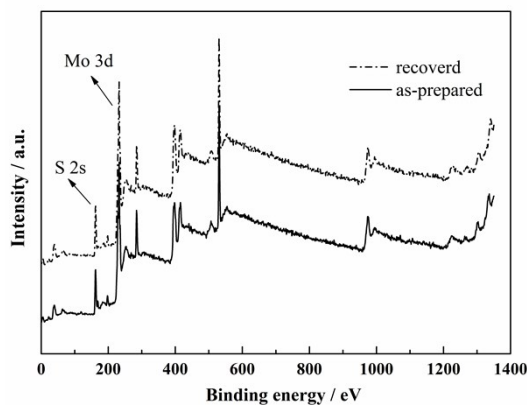

**Fig. S3.** XPS survey spectra of MoS<sub>2</sub> samples as-prepared and recovered after after four runs of H<sub>2</sub>-evolving reaction.

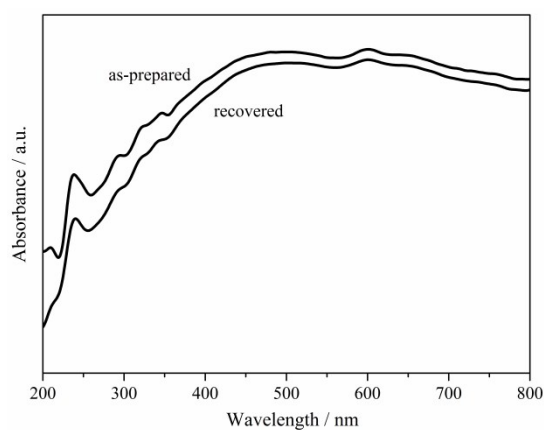

**Fig. S4.** UV-vis diffuse reflectance spectra of MoS<sub>2</sub> samples as-prepared and recovered after four runs of H<sub>2</sub>-evolving reaction.

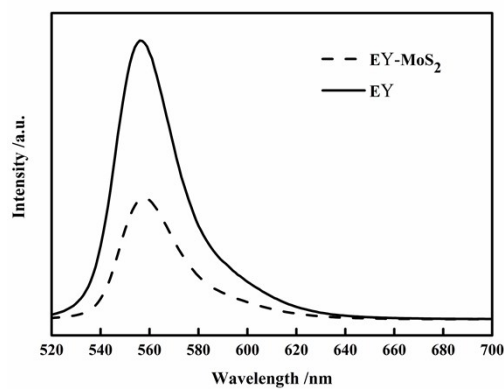

**Fig. S5.** Fluorescence quenching of EY (0.01 mM) by MoS<sub>2</sub> in aqueous TEOA solution (pH = 7.0)
